# Supplementary material for: Utilizing an Animal Model to Identify Brain Neurodegeneration-Related Biomarkers in Aging
Source: MDPI journal article supplement (doi:10.3390/ijms22063278), 2021-03-23
Supplement: s1 [file s1]

# Supplementary Materials

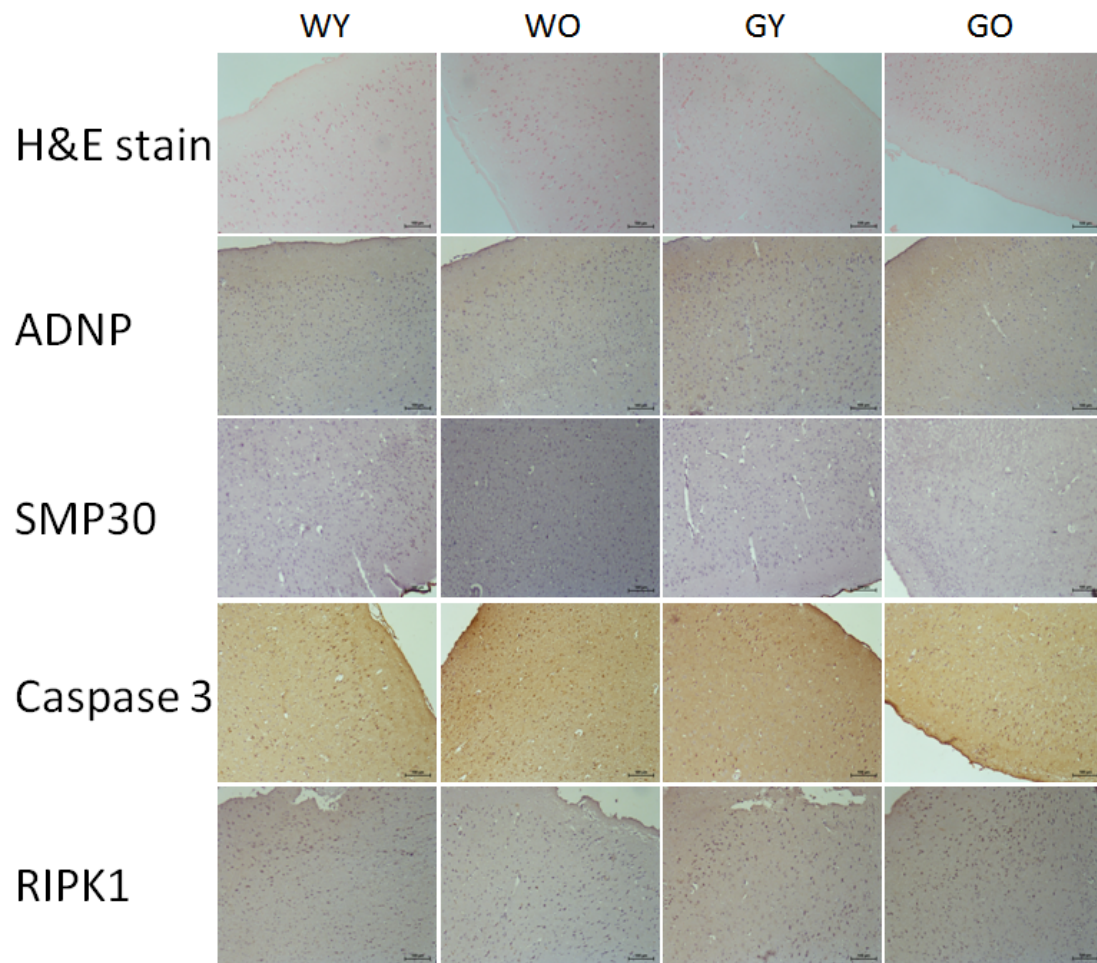

Figure S1. H&E stain and representative IHC images of the cerebrum samples for ADNP, SMP30, Caspase 3 and RIPK1. Basophilic neurons were found in the cerebral cortex. No evident difference was observed among these groups. Abbreviations: young wild-type mice (WY); old wild-type mice (WO); young GNMT<sup>-/-</sup> mice (GY); old GNMT<sup>-/-</sup> mice (GO). Scale bars: 100  $\mu$ m.

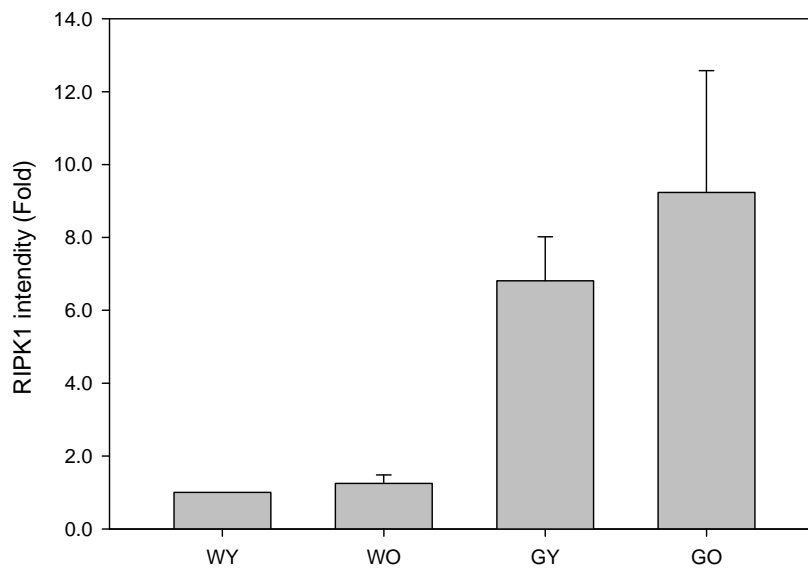

Figure S2. Brain lysates from WY, WO, GY and GO mice were collected, and levels of RIPK1 were analyzed by Western blotting. Beta-actin was used to normalize Western blot data (N=4). Abbreviations: young wild-type mice (WY); old wild-type mice (WO); young  $\text{GNMT}^{-/-}$  mice (GY); old  $\text{GNMT}^{-/-}$  mice (GO).
